# Supplementary material for: Bacterial symbiont subpopulations have different roles in a deep-sea symbiosis
Source: eLife. 2021 Jan 6;10:e58371. doi: 10.7554/eLife.58371 (PMC7787665; doi:10.7554/eLife.58371)
Supplement: Supplementary file 1. — All animals were collected at the Crab Spa vent site in the East Pacific Rise (EPR) Tica area. For proteomic analyses, Riftia trophosome homogenate (Hom) was subjected to Histodenz‐based density gradient centrifugation, separating symbiont cells according to their sizes. After centrifugation, the gradient was carefully disassembled into 24 subsamples/fractions (numbered 1 to 24), all of which were analyzed by CARD‐FISH to identify those fractions in which the percentage of very small, small, medium‐sized and large symbionts cells was highest. These fractions were designated XS, S, M, and L for the respective worm and included in comparative proteomic analyses. [file elife-58371-supp1.xlsx]

## Sheet: Supplementary File 1
Supplementary File 1: Sampling details for specimens and sample types used in this study. All animals were collected at the Crab Spa vent site in the East Pacific Rise (EPR) Tica area. For proteomic analyses, Riftia trophosome homogenate (Hom) was subjected to Histodenz-based density gradient centrifugation, separating symbiont cells according to their sizes. After centrifugation, the gradient wa…
Analysis	Sampling time	Atlantis cruise number	Trophosome sulfur content	Worm # (biological replicate)	Fraction	Sample descrition/quantile		Dive number (date)	Water depth (m)	Latitude	Longitude
Proteomics of rate-zonal density gradient fractions	11/2014	AT26-23	S-rich	R#18 (replicate 1)	Hom	Homogenate		4764	2505	09-50.398N	104-17.479W
					RZ07	XS		(09.11.2014)
					RZ08	S
					RZ20	M
					RZ23	L
				R#27 (replicate 2)	Hom	Homogenate		4766	2512	09-50.309N	104-17.527W
					RZ08	XS		(11.11.2014)
					RZ10	S
					RZ24	M
					RZ22	L
				R#28 (replicate 3)	Hom	Homogenate		4768	2512	09-50.373N	104-17.490W
					RZ07	XS		(13.11.2014)
					RZ10	S
					RZ24	M
					RZ16	L
				R#29 (replicate 4)	Hom	Homogenate		4768	2512	09-50.373N	104-17.490W
					RZ07	XS		(13.11.2014)
					RZ09	S
					RZ19	M
					RZ17	L
			S-depleted	R#30 (relicate 1)	Hom	Homogenate		4769	2513	09-50.588N	104-17.434W
					RZ12	XS		(14.11.2014)
					RZ15	S
					RZ23	M
					RZ24	L
				R#31 (replicate 2)	Hom	Homogenate		4769	2513	09-50.588N	104-17.434W
					RZ07	XS		(14.11.2014)
					RZ09	S
					RZ14	M
					RZ17	L
				R#32 (replicate 3)	Hom	Homogenate		4772	2507	09-50.449N	104-17.543W
					RZ08	XS		(18.11.2014)
					RZ09	S
					RZ24	M
					RZ18	L
Catalyzed reporter deposition fluorescence in situ hybridization (CARD-FISH)	11/2014	AT26-23	S-rich	R#18	Hom	Homogenate		4764	2505	09-50.398N	104-17.479W
					RZ07	Gradient fractions enriched in different cell sizes from smaller symbiont cells (top) to larger symbiont cells (bottom) Hom and all 24 fractions were analyzed in 5 biological replicates.		(09.11.2014)
					RZ08
				R#27	RZ09			4766	2512	09-50.309N	104-17.527W
					RZ10			(11.11.2014)
					RZ11
				R#28	RZ12			4768	2512	09-50.373N	104-17.490W
					RZ13			(13.11.2014)
					RZ14
				R#29	RZ15			4768	2512	09-50.373N	104-17.490W
					RZ16			(13.11.2014)
					RZ17
				R#35	RZ18			4773	2504	09-50.449N	104-17.544W
					RZ19			(19.11.2014)
					RZ20
				(replicates 1-5)	RZ21
					RZ22
					RZ23
					RZ24
			S-depleted	R#30	Hom	Homogenate		4769	2513	09-50.588N	104-17.434W
					RZ07	Gradient fractions enriched in different cell sizes from smaller symbiont cells (top) to larger symbiont cells (bottom) Hom and all 24 fractions were analyzed in 3 biological replicates.		(14.11.2014)
					RZ08
				R#31	RZ09			4769	2513	09-50.588N	104-17.434W
					RZ10			(14.11.2014)
					RZ11
				R#32	RZ12			4772	2507	09-50.449N	104-17.543W
					RZ13			(18.11.2014)
					RZ14
				(replicates 1-3)	RZ15
					RZ16
					RZ17
					RZ18
					RZ19
					RZ20
					RZ21
					RZ22
					RZ23
					RZ24
Flow cytometry	11/2014	AT26-23	medium S	R#19 (replicate 1)	Hom	Homogenate		4764	2505	09-50.398N	104-17.479W
					RZ07	Gradient fractions enriched in smaller symbionts		(09.11.2014)
					RZ08
					RZ09
					RZ19	Gradient fractions enriched in larger symbionts
					RZ21
					RZ22
				R#21 (replicate 2)	Hom	Homogenate		4765	2511	09-50.398N	104-17.480W
					RZ07	Gradient fractions enriched in smaller symbionts		(10.11.2014)
					RZ08
					RZ09
					RZ19	Gradient fractions enriched in larger symbionts
					RZ20
					RZ22
Hybridization chain reaction (HCR) FISH	11/2014	AT26-23	S-rich	R#35	RZ22	Gradient fraction enriched in larger symbionts		4773 (19.11.2014)	2504	09-50.449N	104-17.544W
Transmission electron microscopy (TEM)	04/2017	AT37-12	S-rich	R#9	-	Intact trophosome tissue		4895 (28.04.2019)	2520	09-50.430N	104-17.502W
			S-depleted	R#1	-	Intact trophosome tissue		4893 (26.04.2019)	2508	09-50.239N	104-17.444W
