# Supplementary material for: Bacterial symbiont subpopulations have different roles in a deep-sea symbiosis
Source: eLife. 2021 Jan 6;10:e58371. doi: 10.7554/eLife.58371 (PMC7787665; doi:10.7554/eLife.58371)
Supplement: Supplementary file 5. — Only those 1212 symbiont proteins presented in Supplementary file 2a, which are included in the edgeR statistical evaluation, are included (proteins with low abundance and/or only one or two replicate values were excluded). To allow comparison and summing of protein abundances across proteins within one sample, edgeR-RLE-corrected spectral count values were normalized (a) to protein size and (b) to the sum of all proteins before summing up the proteins within categories (100% = all proteins in Supplementary file 2a). These results indicate that morphological differences between individual symbiont differentiation stages are accompanied by a gradual change in metabolic function. During differentiation from small to large cells, Riftia symbionts rearrange their metabolic priorities, allocating resources to those processes that are most important in their respective life phase and role in the symbiosis. [file elife-58371-supp5.xlsx]

## Sheet: Supplementary File 5
Supplementary File 5: Total (summed up) relative abundance of Endoriftia proteins involved in specific metabolic categories in fractions XS, S, M and L in sulfur-rich (S-rich) Riftia specimens (average values, n=4) and sulfur-depleted (S-depl) Riftia specimens (average values, n=3). Only those 1,212 symbiont proteins presented in Supplementary File 2a, which are included in the edgeR statistical …
	S-rich					S-depl
Category (based on KO, manually curated)	XS	S	M	L		XS	S	M	L
Amino acid metabolism	1.90793	2.06767	2.37911	2.66712		2.25331	2.29397	2.86154	2.74143
Carbon metabolism	16.5513	17.5242	17.8434	18.4894		17.6051	17.7124	18.3046	18.2074
Cell cycle, cell division, cell shape	0.470084	0.53294	0.655882	0.713102		0.571827	0.579308	0.682141	0.701007
Cell wall	1.54547	1.66537	1.9008	1.9068		1.82775	1.88404	2.06837	1.97431
Chaperones, stress response	3.69331	3.39697	3.03475	3.15497		3.88407	3.97888	3.41054	3.29511
Cofactor and vitamin metabolism	2.21202	2.41927	2.91176	2.90184		2.34121	2.64133	2.89243	2.97528
DNA replication, recombination and repair	0.9698	0.858848	1.11077	1.02062		1.11153	1.06902	1.28168	1.28487
Energy metabolism	6.31309	6.90322	7.76677	7.65163		6.45435	6.94889	7.21275	7.45592
Genetic information processing	2.51361	2.56331	2.88608	2.81474		2.69431	2.78026	3.01267	2.96659
Lipid metabolism	0.850794	0.89101	1.01617	1.08626		0.895432	0.917336	1.04203	1.05604
Nitrogen metabolism	3.46398	3.50712	3.86242	3.63263		3.28806	3.63547	3.67647	4.00809
Nucleic acids metabolism	1.54698	1.61488	1.78368	1.90626		1.77757	1.71567	1.90135	1.94844
Other functions (including defense, secondary metabolism)	0.661508	0.674497	0.742277	0.744577		0.69104	0.721422	0.844038	0.859614
Protein folding and processing	1.79204	1.88611	2.24553	2.36546		2.17516	2.25771	2.39253	2.46182
Secretion, pilus, chemotaxis	2.16199	2.153	2.45297	2.32462		2.27548	2.41651	2.46475	2.5857
Signaling	0.613818	0.683914	1.03285	1.04181		0.823255	0.880062	1.228	1.28733
Sulfur metabolism	21.7314	23.0261	21.8334	21.8065		18.5369	19.0841	18.4152	18.6043
Transcription	3.39391	2.88078	3.08707	2.99899		3.26455	3.31324	3.16147	3.44094
Translation	9.04586	9.42498	9.93772	9.61094		8.70153	9.26037	8.23914	9.74787
Transporters	13.8627	10.913	6.8654	6.41504		13.6588	10.828	9.79808	7.27617
Unknown or general function prediction only	4.69062	4.40555	4.64685	4.74109		5.16218	5.07733	5.11318	5.12122
