# Supplementary material for: Bacterial symbiont subpopulations have different roles in a deep-sea symbiosis
Source: eLife. 2021 Jan 6;10:e58371. doi: 10.7554/eLife.58371 (PMC7787665; doi:10.7554/eLife.58371)
Supplement: Supplementary file 6. — Two cell populations were identified, Pop1 and Pop2, which correspond to smaller and larger symbiont cells, respectively (see main text Figure 2 and Figure 2—figure supplement 1). Median fluorescence intensity (FI) per particle, a measure of DNA content per cell, was compared between the two populations 1 and 2 to quantify differences in genome copy number between smaller and larger symbionts (column ‘ratio’). Note that FI ratios were not calculated for samples consisting of sorted populations (bottom rows), because these samples contained high cell numbers of either of the two populations, but very low cell numbers of the respective other population, preventing meaningful comparison. Analyses were performed with samples from two Riftia specimens (two biological replicates, BR). [file elife-58371-supp6.xlsx]

## Sheet: Supplementary File 6
Supplementary File 6: Riftia trophosome homogenate and gradient fractions enriched in small and large symbionts, respectively, were stained with Syto9 and subjected to flow cytometry analysis in a FACSAria high-speed cell sorter with 488 nm excitation (see Methods for details). Two cell populations were identified, Pop1 and Pop2, which correspond to smaller and larger symbiont cells, respectively…
			Population 1					Population 2				ratio
Sample description	Sample name		Count	Freq. of Parent	Mean FI	Median FI		Count	Freq. of Parent	Mean FI	Median FI	Median FI Pop2:Pop1
Trophosome homogenate (BR 1)	20200212_Riftia 19 HOM FA RNase_Syto9.fcs		2398	12	1212	1097		2119	10.6	7341	7033	6.41112
Trophosome homogenate (BR 2)	20200212_Riftia 21 HOM FA RNase_Syto9.fcs		1802	9.01	253	186		1444	7.22	3401	3221	17.3172
Gradient fractions enriched in small symbionts (BR 1)	20200212_Riftia 19 RZ07 FA RNase_Syto9.fcs		4484	43.8	1373	1136		53	0.52	10317	9136	8.04225
	20200212_Riftia 19 RZ08 FA RNase_Syto9.fcs		9085	45.4	1395	1097		203	1.02	9828	8716	7.94531
	20200212_Riftia 19 RZ09 FA RNase_Syto9.fcs		8547	42.7	1470	1150		294	1.47	9260	8063	7.0113
Gradient fractions enriched in small symbionts (BR 2)	20200212_Riftia 21 RZ07 FA RNase_Syto9.fcs		2946	14	685	577		70	0.33	5748	4407	7.63778
	20200212_Riftia 21 RZ08 FA RNase_Syto9.fcs		2672	13.4	432	359		64	0.32	3832	2860	7.96657
	20200212_Riftia 21 RZ09 FA RNase_Syto9.fcs		2658	13.3	501	431		57	0.29	3466	2712	6.29234
Gradient fractions enriched in large symbionts (BR 1)	20200212_Riftia 19 RZ19 FA RNase_Syto9.fcs		2669	13.3	2549	1994		3003	15	11734	10459	5.24524
	20200212_Riftia 19 RZ21 FA RNase_Syto9.fcs		2910	14.5	2125	1686		3457	17.3	10249	9074	5.38197
	20200212_Riftia 19 RZ22 FA RNase_Syto9.fcs		2097	10.5	1957	1535		2669	13.3	10218	9534	6.21107
Gradient fractions enriched in large symbionts (BR 2)	20200212_Riftia 21 RZ19 FA RNase_Syto9.fcs		1242	6.21	735	451		2408	12	6746	5750	12.7494
	20200212_Riftia 21 RZ20 FA RNase_Syto9.fcs		1123	5.62	705	424		2026	10.1	7695	6792	16.0189
	20200212_Riftia 21 RZ22 FA RNase_Syto9.fcs		1633	8.16	893	497		2043	10.2	11365	10723	21.5755
Pop 1 sorted from trophosome homogenate	20200212_small Syto sorted.fcs			49.9	485	419			0.25	7737	7269
Pop 2 sorted from trophosome homogenate	20200212_large Syto sorted.fcs			7.61	993	527			49.6	3860	3708
									average ratio BR 1:			6.60689
									standard deviation BR 1:			1.03955
									average ratio BR 2:			12.794
									standard deviation BR 2			5.34706
									average ratio (total):			9.70042
									standard deviation (total):			4.94022
