# Supplementary material for: Bacterial symbiont subpopulations have different roles in a deep-sea symbiosis
Source: eLife. 2021 Jan 6;10:e58371. doi: 10.7554/eLife.58371 (PMC7787665; doi:10.7554/eLife.58371)
Supplement: Supplementary file 7. — Significant - protein abundance significantly different between fractions containing symbionts of different size (see Materials and methods for details on statistical analysis). Y - yes, N - no, M - maybe. [file elife-58371-supp7.xlsx]

## Sheet: Supplementary File 7
Supplementary File 7: Proteins identified as likely involved in dissimilatory sulfur metabolism in Ca. E. persephone after Blast-comparison against proteins identified in the literature: Weissgerber T, Sylvester M, Kröninger L, Dahl C. 2014. A comparative quantitative proteomic study identifies new proteins relevant for sulfur oxidation in the purple sulfur bacterium Allochromatium vinosum. Appl …
Accession	Protein annotation	involved in sulfur oxidation?	detected as protein?	significant?	general abundance trend (if significant) S-rich S-depleted
Sym_2601635419	Adenylylsulfate reductase subunit alpha AprA	Y	Y	Y	small>large
Sym_2601635420	Adenylylsulfate reductase subunit beta AprB	Y	Y	N
Sym_EGV50053.1	adenylylsulfate reductase, alpha subunit AprA	Y	Y	N
Sym_EGV52780.1	anaerobic dimethyl sulfoxide reductase chain B/ SreB/SoeB/ PSRLC3	M	N	N
Sym_2601636305	DsrA	Y	Y	N
Sym_EGV52261.1	DsrA	Y	Y	N
Sym_EGV52262.1	DsrB	Y	Y	N
Sym_EGV52266.1	DsrC	Y	Y	Y	small>large	small>large
Sym_EGW53956.1	DsrC	Y	N	N
Sym_EGV52257.1	DsrC family protein	Y	Y	Y	small>large
Sym_EGV52361.1	DsrC/ DsrC family	Y	Y	Y		small>large
Sym_EGV50535.1	DsrC/ DsrC-like	Y	Y	N
Sym_EGV52263.1	DsrE	Y	Y	N
Sym_EGV50105.1	DsrE2	Y	N	N
Sym_EGV51796.1	DsrE2	Y	Y	Y	large>small
Sym_EGV52264.1	DsrF	Y	Y	Y		small>large
Sym_EGV52265.1	DsrH	Y	Y	N
Sym_EGV52270.1	DsrJ	Y	N	N
Sym_EGV52268.1	DsrK	Y	Y	Y	large>small	large>small
Sym_EGV52269.1	DsrL	Y	Y	N
Sym_EGV52267.1	DsrM	Y	Y	N
Sym_EGV52273.1	DsrN	Y	N	N
Sym_EGW53659.1	DsrN	Y	Y	N
Sym_2601636291	DsrN / cobyrinate a,c-diamide synthase	M	Y	N
Sym_2601636293	DsrO	Y	Y	N
Sym_EGV52272.1	DsrP	Y	N	N
Sym_EGV52275.1	DsrR	Y	Y	N
Sym_EGV52276.1	DsrS	Y	Y	Y	large>small
Sym_2601634706	FccA	Y	N	N
Sym_EGV51006.1	FccA	Y	Y	N
Sym_EGV52863.1	FccA	Y	Y	N
Sym_EGV52186.1	FccA (putative)	Y/M	N	N
Sym_EGV49859.1	FccB	Y	N	N
Sym_EGV51007.1	FccB	Y	Y	Y	small>large
Sym_EGV50679.1	PhsC; thiosulfate reductase cytochrome b subunit	M	Y	Y	small>large	small>large
Sym_EGV50955.1	putative SoxL	Y/M	Y	Y		large>small
Sym_EGV51355.1	putative SoxW type thioredoxin	M	Y	N
Sym_2601633320	QmoA	Y	Y	Y	large>small
Sym_EGV50291.1	QmoA	Y	Y	N
Sym_EGV52354.1	QmoA	Y	Y	Y	large>small
Sym_EGV52355.1	QmoB	Y	Y	N
Sym_EGV52356.1	QmoC	Y	Y	Y		large>small
Sym_EGV50779.1	rhodanese-like protein	M	Y	N
Sym_EGV49918.1	Sgp protein	Y	Y	Y	small>large	small>large
Sym_EGV51298.1	SgpA	Y	Y	N
Sym_EGV51608.1	SgpB	Y	Y	N
Sym_EGW54364.1	SgpB	Y	Y	Y	small>large	small>large
Sym_EGV50398.1	SgpC	Y	N	N
Sym_EGW54499.1	SgpC	Y	N	N
Sym_EGV51976.1	SoeA	Y	Y	Y		large>small
Sym_EGV51975.1	SoeB	Y	Y	N
Sym_EGV51974.1	SoeC	Y	Y	N
Sym_EGV50245.1	SoeC/ anaerobic dimethyl sulfoxide reductase, A subunit, DmsA/YnfE family	M	N	N
Sym_EGV50426.1	SoxA	Y	Y	N
Sym_2601635312	SoxB	Y	Y	N
Sym_EGV50931.1	SoxB	Y	Y	N
Sym_EGV50425.1	SoxK	Y	Y	N
Sym_EGV50424.1	SoxL	Y	Y	N
Sym_EGV52219.1	SoxL/ rhodanese domain protein	M	Y	N
Sym_EGV50427.1	SoxX	Y	Y	N
Sym_EGV52247.1	SoxY	Y	Y	N
Sym_EGV52246.1	SoxZ	Y	Y	Y	large>small
Sym_EGV51808.1	SqrF	Y	Y	N
Sym_EGV51162.1	SreA	Y	Y	N
Sym_2601636275	sreA; sulfur reductase molybdopterin subunit	Y	N	N
Sym_EGV51161.1	SreB	Y	N	N
Sym_EGV51160.1	SreC	Y	N	N
Sym_EGV50710.1	Sulfate adenylyltransferase Sat	Y	Y	N
Sym_EGV49794.1	Sulfate permease	Y	Y	N
Sym_2601634801	sulfate permease (SulP)	Y	Y	Y	large>small	large>small
Sym_EGV52704.1	Sulfate transporter	Y	Y	N
Sym_EGV50940.1	Sulfate transporter cysZ	Y	Y	N
Sym_EGV50288.1	Sulfhydrogenase 1 subunit beta hydB	M	Y	N
Sym_EGV50287.1	Sulfhydrogenase 1 subunit gamma hydG/ Anaerobic sulfite reductase subunit B ArsB	M	Y	Y		large>small
Sym_EGV50140.1	Sulfide-quinone reductase SqrD	Y	N	N
Sym_2601635970	Sulfur carrier protein DsrE2	Y	N	N
Sym_EGV51798.1	Sulfurtransferase Alvin_2599 (Rhd_2599)	Y	Y	N
Sym_EGV52654.1	thiosulfate sulfurtransferase	M/N	Y	N
Sym_EGV50246.1	TtrB; tetrathionate reductase subunit B/ SoeB/ SreB	M	N	N
Sym_EGV51797.1	TusA	Y	Y	Y	small>large	small>large
